# Supplementary material for: Association of volunteering with mental well-being: a lifecourse analysis of a national population-based longitudinal study in the UK
Source: PubMed Central journal article supplement — BMJ Open. 2016 Aug 3;6(8):e011327. doi: 10.1136/bmjopen-2016-011327 (PMC4985873; doi:10.1136/bmjopen-2016-011327), 2016-08-03

## **Supplementary material**

### **Figures' legend**

Supplementary Figure 1: Volunteering status by years in BHPS (1996-2008)

Supplementary Figure 2: Mean GHQ (95% CI) by volunteering

Supplementary Fig 1

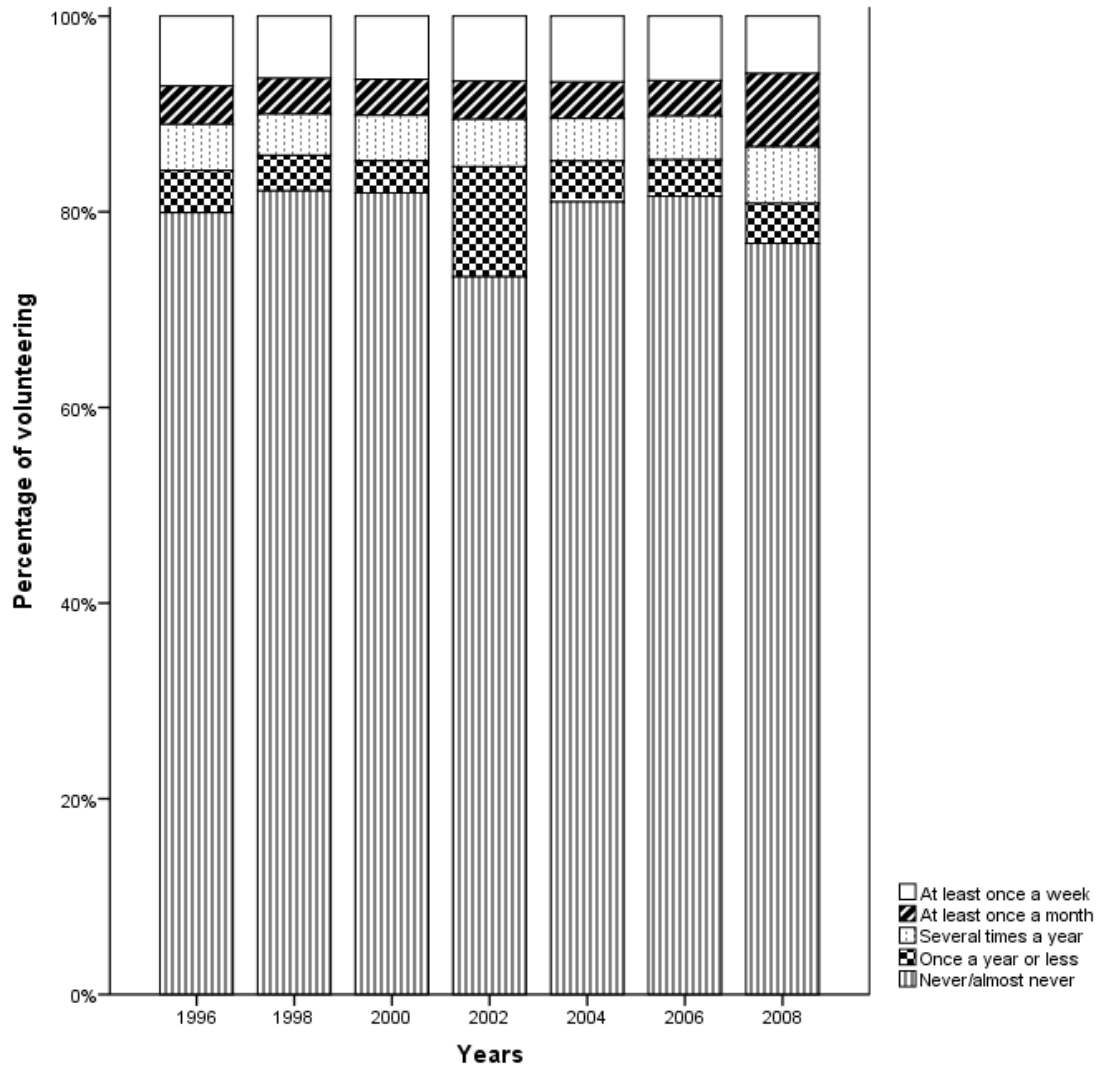

Supplementary Fig 2

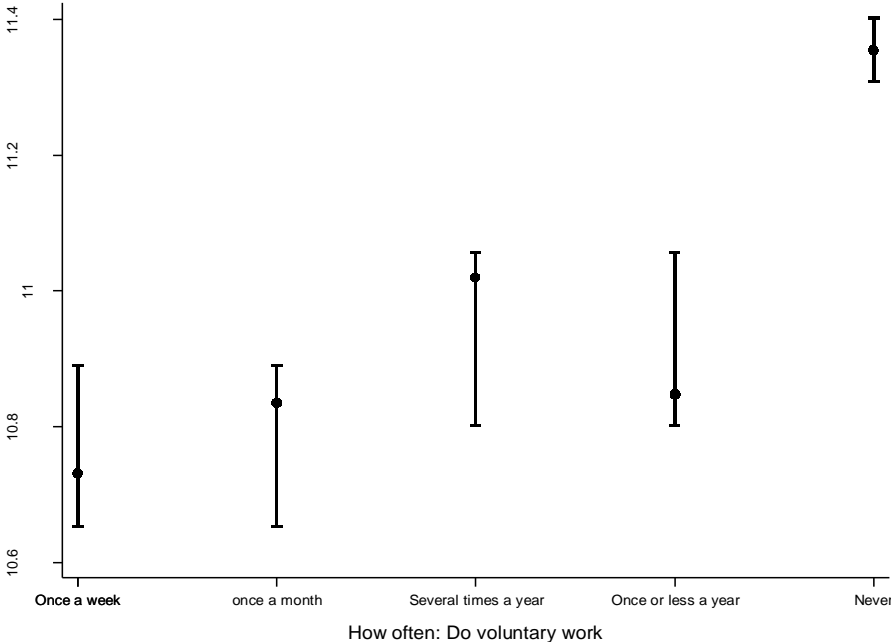

Supplement: bmjopen-2016-011327supp_figures.pdf [file bmjopen-2016-011327supp_figures.pdf]
